# Supplementary material for: Affected pathways and transcriptional regulators in gene expression response to an ultra-marathon trail: Global and independent activity approaches
Source: PLOS journal article supplement (doi:10.1371/journal.pone.0180322), 2017-10-13
Supplement: S1 (10.1371/journal.pone.0180322.s001) [file journal.pone.0180322.s001]

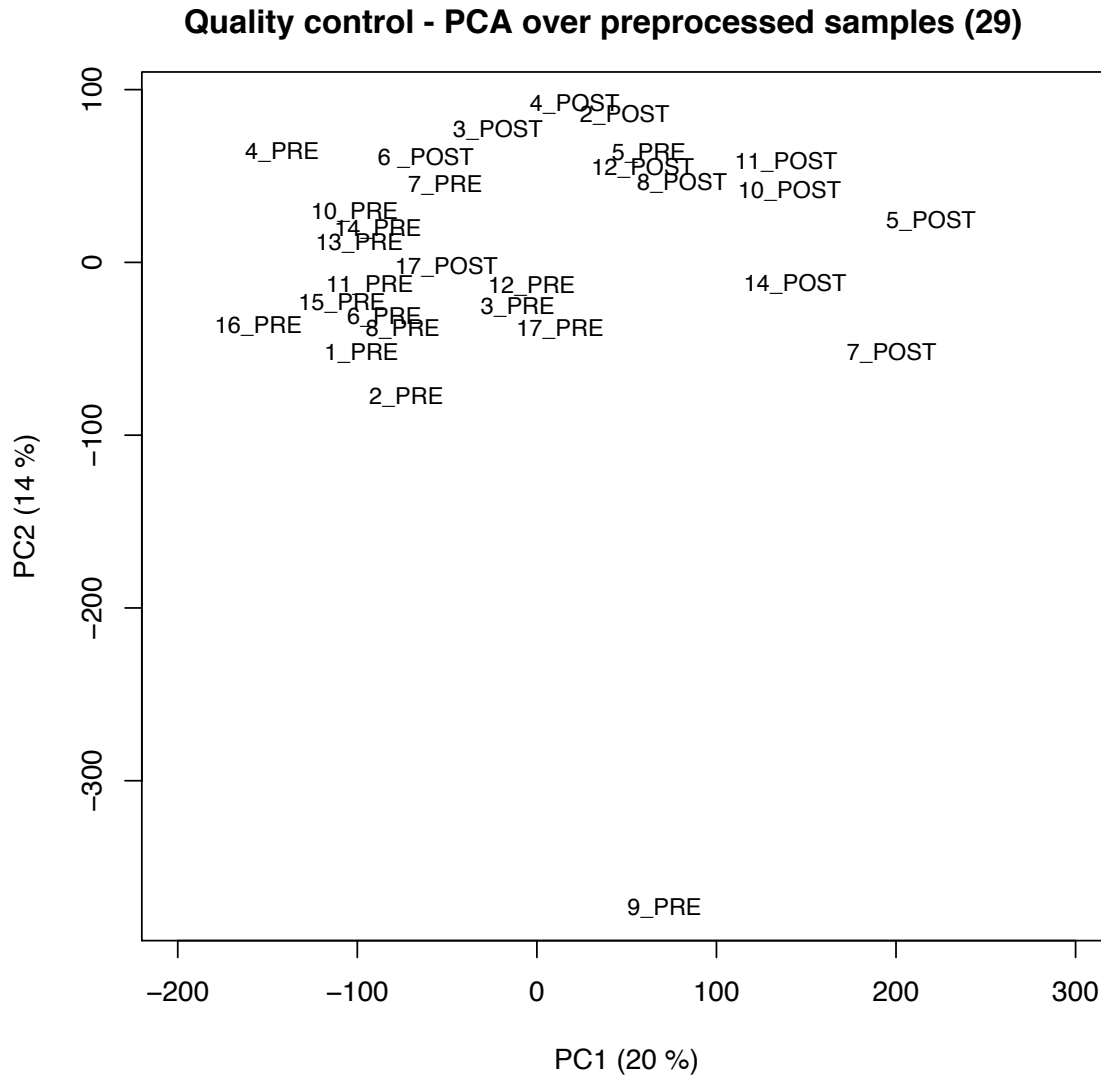

**S1 Fig. Quality control – PCA over the expression values of the pre-processed microarray data from the initial 29 samples.** PCA over 53,617 TCs expression values included in HuGene20st microarray. First (abscissa) and second principal components (ordinate) are shown. They are capturing 20% (PC1) and 14% (PC2) of the total data variance. Sample identified as 9\_PRE clearly shows a distinct pattern compared to the rest of arrays so it was excluded for downstream analysis.
