# Supplementary material for: Affected pathways and transcriptional regulators in gene expression response to an ultra-marathon trail: Global and independent activity approaches
Source: PLOS journal article supplement (doi:10.1371/journal.pone.0180322), 2017-10-13
Supplement: S2 (10.1371/journal.pone.0180322.s002) [file journal.pone.0180322.s002]

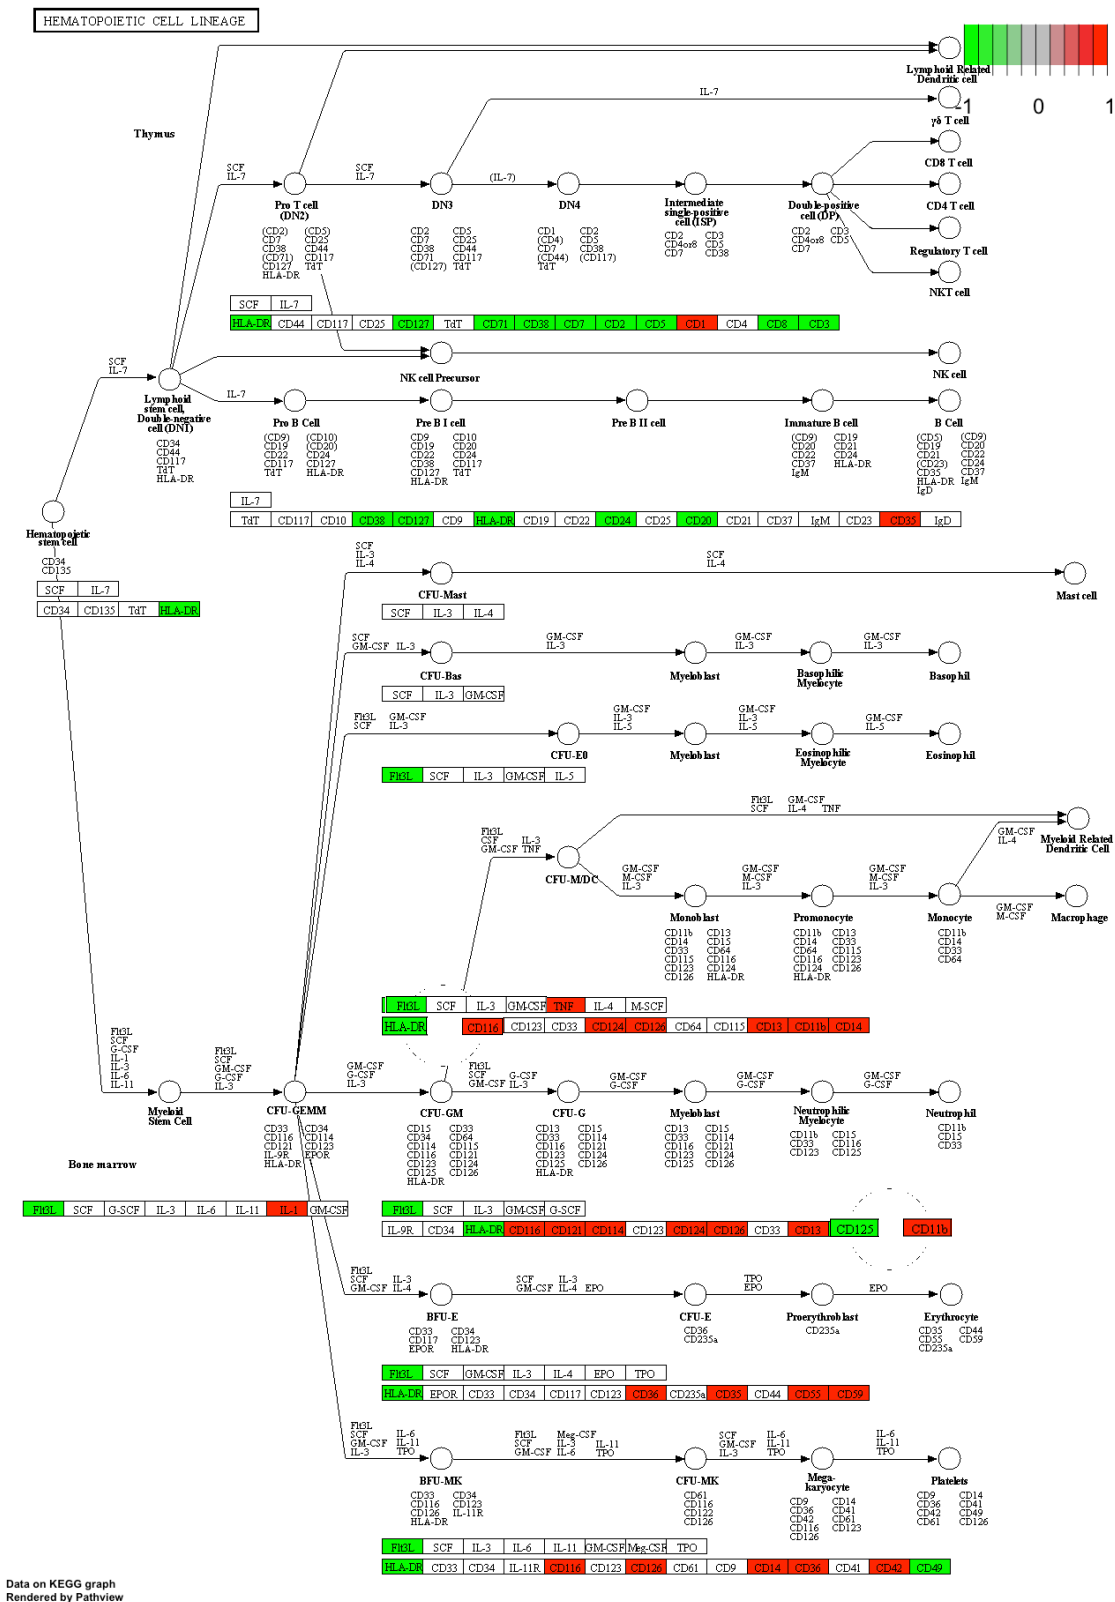

**S2 Fig. Overrepresented hematopoietic cell lineage extracted from KEGG Pathway database with differential genes highlighted.** This KEGG pathway (ID hsa04640) is ranked according to results from GEA. Differential genes are coloured in red or green if they are up- or down-regulated respectively. Reprinted from [1,2,3] under a CC BY license, with permission from *Kanehisa Laboratories*, original copyright 2016.

- [1] Kanehisa M, Goto S. KEGG: kyoto encyclopedia of genes and genomes. *Nucleic Acids Res* 2000;28:27–30.
- [2] Kanehisa M., Tanabe, M., Sato, Y., and Morishima, K. KEGG: new perspectives on genomes, pathways, diseases and drugs. *Nucleic Acids Res* 2017; 45, D353-D361.
- [3] Kanehisa, M., Sato, Y., Kawashima, M., Furumichi, M., and Tanabe, M. KEGG as a reference resource for gene and protein annotation. *Nucleic Acids Res* 2016; 44, D457-D462.
