# Supplementary material for: Affected pathways and transcriptional regulators in gene expression response to an ultra-marathon trail: Global and independent activity approaches
Source: PLOS journal article supplement (doi:10.1371/journal.pone.0180322), 2017-10-13
Supplement: S3 (10.1371/journal.pone.0180322.s003) [file journal.pone.0180322.s003]

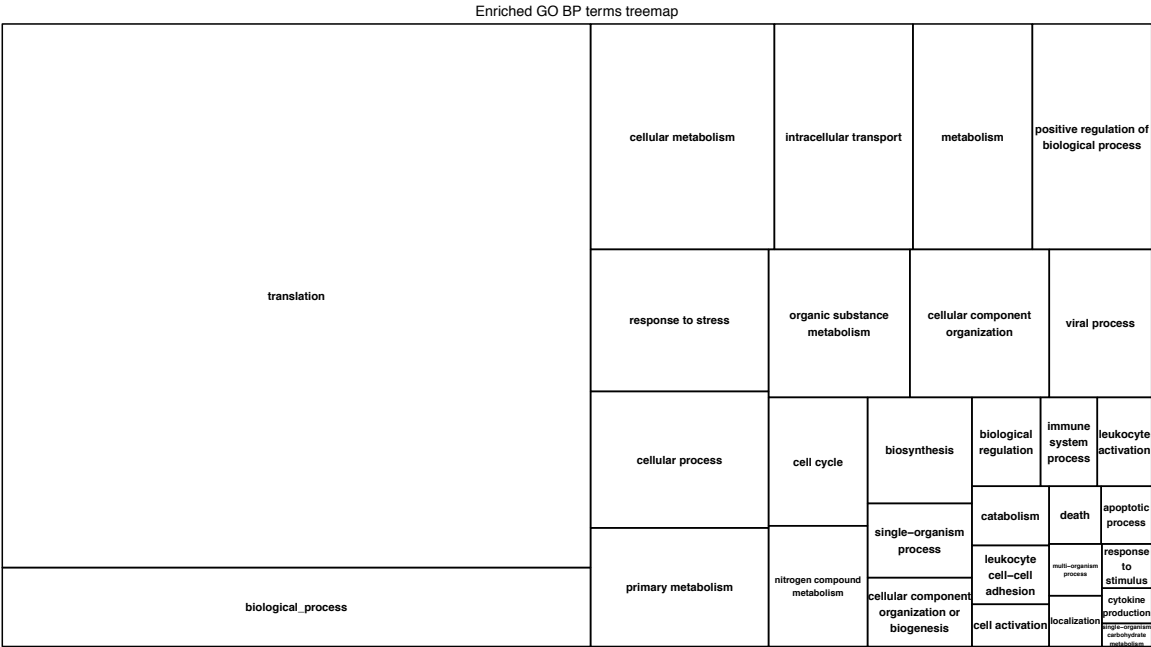

**S3 Fig. Summary of the 1232 statistically overrepresented GO terms from Biological Processes ontology.** Obtained terms are grouped and annotated to their representative based on a semantic similarity measure through REVIGO web server [1] using default parameters. Area of each representative rectangle is inversely proportional to the p-value obtained in the hypergeometric test. The treemap was generated with *treemap* package [2].

[1] F. Supek, M. Bošnjak, N. Škunca, and T. Šmuc, “REVIGO summarizes and visualizes long lists of gene ontology terms.,” *PLoS One*, vol. 6, no. 7, p. e21800, Jan. 2011.

[2] M. Tennekes, “treemap: Treemap Visualization. R package version 2.4-1.” 2016.
