# Supplementary material for: Affected pathways and transcriptional regulators in gene expression response to an ultra-marathon trail: Global and independent activity approaches
Source: PLOS journal article supplement (doi:10.1371/journal.pone.0180322), 2017-10-13
Supplement: S14 (10.1371/journal.pone.0180322.s014) [file journal.pone.0180322.s014]

**S8 Table. Number of main contributors to each IC based on their highest weight values.** Those located in the ninth decile were chosen, obtaining a total of 509 genes per IC. Table shows the number of matches between components and the elements that were unique per IC.

| Unique genes | #IC        | IC1 | IC2 | IC3 | IC4 | IC5 | IC6 |
|--------------|------------|-----|-----|-----|-----|-----|-----|
| 190          | <b>IC1</b> | 509 | 124 | 179 | 75  | 68  | 99  |
| 225          | <b>IC2</b> |     | 509 | 84  | 108 | 102 | 94  |
| 206          | <b>IC3</b> |     |     | 509 | 50  | 101 | 83  |
| 187          | <b>IC4</b> |     |     |     | 509 | 136 | 204 |
| 163          | <b>IC5</b> |     |     |     |     | 509 | 209 |
| 111          | <b>IC6</b> |     |     |     |     |     | 509 |
