# Supplementary material for: Affected pathways and transcriptional regulators in gene expression response to an ultra-marathon trail: Global and independent activity approaches
Source: PLOS journal article supplement (doi:10.1371/journal.pone.0180322), 2017-10-13
Supplement: S17 (10.1371/journal.pone.0180322.s017) [file journal.pone.0180322.s017]

**S11 Table. List of the statistically overrepresented transcriptional regulators (TRs) obtained per IC after ICA.** Three ICs (IC1, IC3 and IC4) among the computed six components shown enriched TRs. TR symbol is indicated for each TR in the list. *Gene Ratio* indicates the number of target genes regulated by the TR within the specific list of 509 major contributor genes which appear in customized TR database obtained from ORA per IC. *Bg Ratio* refers to the number of target genes regulated by the TR within the background (4,772 genes included in the customized database for TREA among the 5,084 differential genes). TRs are sorted based on the adj p-value obtained (FDR).

| #IC | TR symbol | GeneRatio | BgRatio   | p.adj  | p.adj limma         |
|-----|-----------|-----------|-----------|--------|---------------------|
| IC1 | TAL1      | 128/450   | 864/4772  | <0.001 | Not ranked by limma |
|     | ESR1      | 201/450   | 1656/4772 | <0.001 | Not ranked by limma |
|     | SPI1      | 149/450   | 1190/4772 | <0.001 | <0.001              |
|     | CTCF      | 383/450   | 3720/4772 | <0.001 | Not ranked by limma |
|     | GATA2     | 182/450   | 1547/4772 | 0.001  | Not ranked by limma |
|     | FOXA1     | 288/450   | 2685/4772 | 0.002  | Not ranked by limma |
|     | GATA3     | 219/450   | 1981/4772 | 0.005  | 0.018               |
|     | SMARCA4   | 388/450   | 3859/4772 | 0.006  | Not ranked by limma |
|     | STAT1     | 310/450   | 2972/4772 | 0.006  | 0.005               |
|     | TP53      | 68/450    | 548/4772  | 0.036  | Not ranked by limma |
|     | TRIM28    | 91/450    | 772/4772  | 0.038  | 0.001               |
| IC3 | GATA2     | 186/470   | 1547/4772 | 0.017  | Not ranked by limma |
| IC4 | SMARCA4   | 412/468   | 3859/4772 | <0.001 | Not ranked by limma |
|     | ETS1      | 365/468   | 3453/4772 | 0.044  | 0.007               |
